# Supplementary material
Source: publisher site journal article supplement (https://e-cmh.org/upload/media/cmh-2023-0121-Supplementary-10.pdf)

**Appendix 10.** Dynamic change on HR for each individual predictor since initiation of AVT until on-treatment year 5. The figure revealed that the HR estimates of each individual variable diminished with the prolongation of AVT. This indicated the predictability of a single indicator constituting the scoring formula attenuated over time.

Notes: The Reference group for HRs of ALT 15–45 U/L, ALT >45 U/L, ALB <35 g/dL, TBIL >18 μmol/L, PLT <150\*10<sup>9</sup>/L, LSM 8–13 kPa, LSM >13 kPa, AFP 4.1–20 μg/L, AFP >20 μg/L, log HBV DNA 4–6 IU/mL, log HBV DNA >6 IU/mL were: ALT <15 U/L, ALB >35 g/dL, TBIL ≤18 μmol/L, PLT ≥150\*10<sup>9</sup>/L, LSM <8 kPa, AFP <4.1 μg/L, log HBV DNA ≤4 IU/mL respectively. Missing HR estimates mean that calculations for HR were not applicable due to zero endpoints in the reference group or in the estimated group.

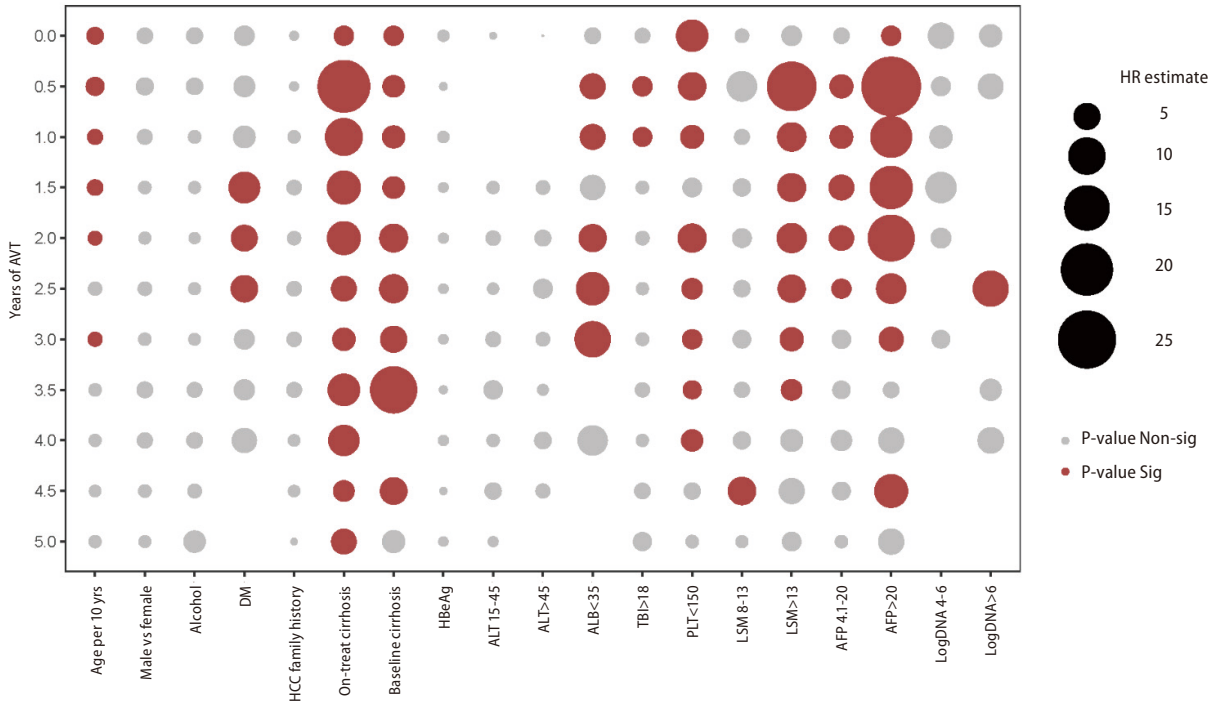

Supplement: Supplementary file 1 [file cmh-2023-0121-Supplementary-10.pdf]
